# Supplementary material for: Endothelial exosomes contribute to the antitumor response during breast cancer neoadjuvant chemotherapy via microRNA transfer
Source: PubMed Central journal article supplement (PMC4496353; doi:10.18632/oncotarget.3520), 2015-03-10
Supplement: oncotarget-06-10253-s001.pdf [file oncotarget-06-10253-s001.pdf]

# Endothelial exosomes contribute to the antitumor response during breast cancer neoadjuvant chemotherapy via microRNA transfer

## Supplementary Material

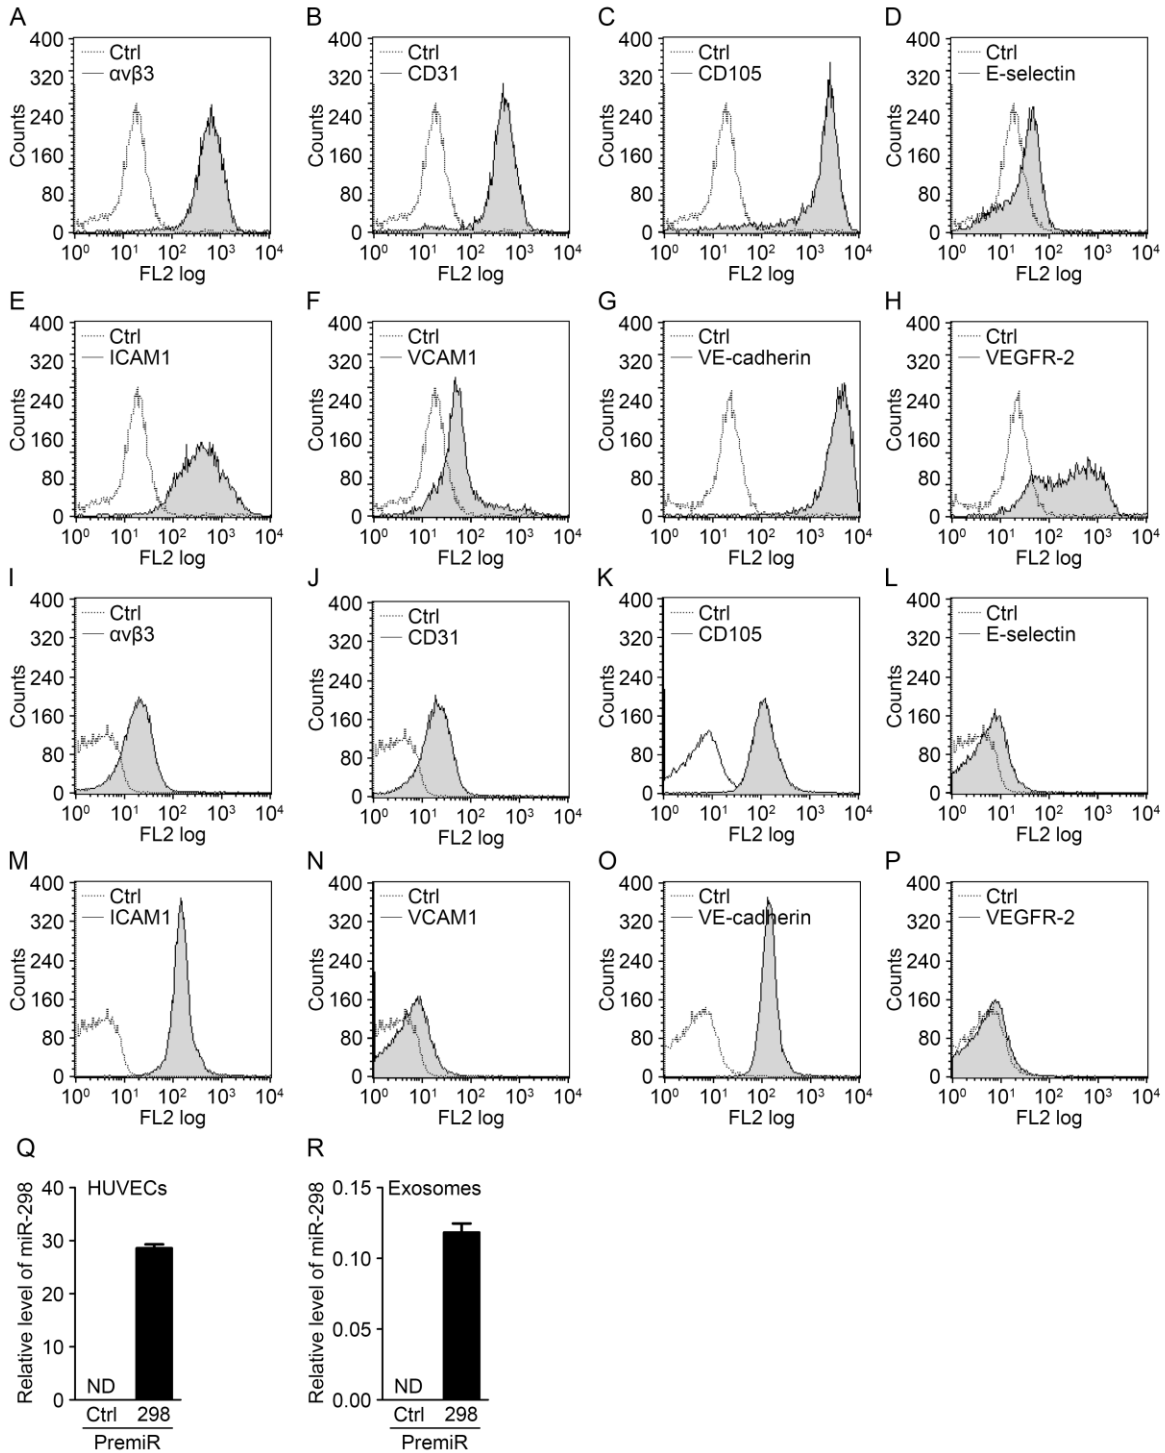

## Figure S1

(A-H) Flow cytometry analysis of HUVECs for the levels of (A)  $\alpha v\beta 3$  integrins, (B) CD31, (C) CD105, (D) E-selectin, (E) ICAM-1, (F) VCAM-1, (G) VE-cadherin and (H) VEGFR2. (I-P) Flow cytometry analysis of HUVEC exosomes for the levels of (I)  $\alpha v\beta 3$  integrins, (J) CD31, (K) CD105, (L) E-selectin, (M) ICAM-1, (N) VCAM-1, (O) VE-cadherin and (P) VEGFR2. (Q) MiR-298 levels evaluated by qRT-PCR in HUVECs transfected with pre-miR-298 or pre-miR-control. (R) MiR-298 levels evaluated by qRT-PCR in the exosomes of HUVECs transfected with pre-miR-298 or pre-miR-control.

A

| miRNAs only detected in exosomes                                                                                                                             | Common miRNAs between HUVECs and exosomes                                                                                                                                                                                                                                                                                                                                                                                                                                                                                                                                                                                                                                                                                                                                                                                                                                                                                                                                                                                                                                                                                                                                                                                                                                                                                                                                                                                                                                                                                                                                                                                                               | miRNAs only detected in HUVECs                                                                                |
|--------------------------------------------------------------------------------------------------------------------------------------------------------------|---------------------------------------------------------------------------------------------------------------------------------------------------------------------------------------------------------------------------------------------------------------------------------------------------------------------------------------------------------------------------------------------------------------------------------------------------------------------------------------------------------------------------------------------------------------------------------------------------------------------------------------------------------------------------------------------------------------------------------------------------------------------------------------------------------------------------------------------------------------------------------------------------------------------------------------------------------------------------------------------------------------------------------------------------------------------------------------------------------------------------------------------------------------------------------------------------------------------------------------------------------------------------------------------------------------------------------------------------------------------------------------------------------------------------------------------------------------------------------------------------------------------------------------------------------------------------------------------------------------------------------------------------------|---------------------------------------------------------------------------------------------------------------|
| miR-122, miR-133a, miR-133b, miR-142-3p, miR-142-5p, miR-143, miR-144, miR-150, miR-202, miR-223, miR-451, miR-486-5p, miR-506, miR-509-3p, miR-596, miR-631 | let-7b, let-7d, let-7d*, let-7g, let-7i, miR-101, miR-106a, miR-107, miR-10b, miR-125a-5p, miR-125b, miR-126, miR-126*, miR-128, miR-130a, miR-130b, miR-132, miR-134, miR-136, miR-137, miR-138, miR-139-5p, miR-140-3p, miR-140-5p, miR-146a, miR-148a, miR-148b, miR-149, miR-151-3p, miR-151-5p, miR-152, miR-154, miR-15a, miR-15b, miR-16, miR-17, miR-181a, miR-181b, miR-181c, miR-185, miR-186, miR-188-5p, miR-18a, miR-18a*, miR-18b, miR-191, miR-192, miR-193a-3p, miR-193a-5p, miR-193b, miR-194, miR-195, miR-196b, miR-197, miR-197b, miR-199a-3p, miR-199b-5p, miR-19a, miR-19b, miR-20a, miR-20b*, miR-21, miR-21*, miR-210, miR-215, miR-217, miR-218, miR-219-5p, miR-22, miR-22*, miR-221, miR-222, miR-23a, miR-23b, miR-24, miR-25, miR-26a, miR-27a, miR-27b, miR-28-5p, miR-296-5p, miR-29a, miR-29b, miR-29c, miR-30b, miR-30c, miR-30c-2*, miR-30d, miR-30e*, miR-32, miR-320a, miR-323-3p, miR-324-3p, miR-324-5p, miR-326, miR-328, miR-337-3p, miR-337-5p, miR-338-3p, miR-339-5p, miR-33b, miR-342-3p, miR-345, miR-346, miR-34a, miR-34c-3p, miR-365, miR-374b, miR-377, miR-378, miR-381, miR-382, miR-409-3p, miR-411, miR-421, miR-423-3p, miR-423-5p, miR-424, miR-425, miR-425*, miR-431, miR-432, miR-433, miR-455-5p, miR-483-3p, miR-484, miR-490-3p, miR-483, miR-497, miR-501-5p, miR-502-5p, miR-503, miR-505, miR-532-5p, miR-574-3p, miR-582-5p, miR-584, miR-589, miR-590-5p, miR-595, miR-597, miR-598, miR-622, miR-629, miR-651, miR-652, miR-680, miR-683, miR-665, miR-671-5p, miR-720, miR-744, miR-877, miR-886-3p, miR-887, miR-888, miR-92a, miR-92b, miR-93, miR-934, miR-940, miR-99a, miR-99b | miR-141, miR-181a*, miR-26a-2*, miR-362-5p, miR-454, miR-514, miR-548b-3p, miR-576-3p, miR-576-5p, miR-654-5p |

B

| miRNA          | Fold  | P value | miRNA           | Fold | P value | miRNA           | Fold | P value | miRNA           | Fold | P value |
|----------------|-------|---------|-----------------|------|---------|-----------------|------|---------|-----------------|------|---------|
| hsa-miR-502-5p | 29,50 | 0,006   | hsa-miR-339-5p  | 2,38 | 0,216   | hsa-miR-23a     | 1,49 | 0,083   | hsa-miR-589     | 0,67 | 0,234   |
| hsa-miR-744    | 23,35 | 0,032   | hsa-miR-191     | 2,36 | 0,068   | hsa-miR-216a    | 1,47 | 0,005   | hsa-miR-500a    | 0,66 | 0,273   |
| hsa-miR-373*   | 19,74 | 0,010   | hsa-miR-197     | 2,34 | 0,023   | hsa-miR-196b    | 1,47 | 0,313   | hsa-miR-888     | 0,65 | 0,373   |
| hsa-miR-572    | 12,00 | 0,123   | hsa-miR-140-5p  | 2,29 | 0,173   | hsa-miR-140-3p  | 1,46 | 0,515   | hsa-miR-193b    | 0,64 | 0,072   |
| hsa-miR-487b   | 8,23  | 0,060   | hsa-miR-376c    | 2,29 | 0,045   | hsa-miR-338-3p  | 1,44 | 0,271   | hsa-miR-130a    | 0,64 | 0,076   |
| hsa-miR-886-3p | 7,80  | 0,002   | hsa-let-7i      | 2,29 | 0,040   | hsa-miR-19a     | 1,42 | 0,217   | hsa-miR-934     | 0,61 | 0,026   |
| hsa-miR-128    | 7,80  | 0,013   | hsa-miR-218     | 2,25 | 0,294   | hsa-miR-665     | 1,42 | 0,218   | hsa-miR-152     | 0,60 | 0,027   |
| hsa-miR-431    | 6,87  | 0,008   | hsa-miR-127-3p  | 2,25 | 0,005   | hsa-miR-199a-3p | 1,41 | 0,053   | hsa-miR-595     | 0,60 | 0,447   |
| hsa-miR-31*    | 5,64  | 0,003   | hsa-miR-93      | 2,19 | 0,131   | hsa-miR-21      | 1,40 | 0,054   | hsa-miR-423-5p  | 0,59 | 0,095   |
| hsa-miR-495    | 5,03  | 0,020   | hsa-miR-27b     | 2,17 | 0,013   | hsa-miR-382     | 1,40 | 0,527   | hsa-miR-451     | 0,55 | 0,122   |
| hsa-miR-18a*   | 4,97  | 0,068   | hsa-miR-26b     | 2,17 | 0,056   | hsa-miR-222     | 1,37 | 0,004   | hsa-miR-450a    | 0,49 | 0,262   |
| hsa-miR-1979   | 4,89  | 0,003   | hsa-miR-425*    | 2,17 | 0,182   | hsa-miR-32      | 1,36 | 0,142   | hsa-miR-34c-3p  | 0,44 | 0,043   |
| hsa-miR-148a   | 4,85  | 0,004   | hsa-miR-940     | 2,16 | 0,023   | hsa-let-7d*     | 1,36 | 0,314   | hsa-miR-34a     | 0,41 | 0,015   |
| hsa-miR-886-5p | 4,75  | 0,047   | hsa-miR-337-3p  | 2,15 | 0,178   | hsa-let-7b      | 1,35 | 0,251   | hsa-miR-181c    | 0,38 | 0,077   |
| hsa-miR-31     | 4,64  | 0,005   | hsa-miR-126*    | 2,15 | 0,069   | hsa-miR-433     | 1,34 | 0,602   | hsa-miR-210     | 0,36 | 0,122   |
| hsa-miR-154*   | 4,61  | 0,017   | hsa-miR-374a    | 2,14 | 0,126   | hsa-miR-328     | 1,32 | 0,521   | hsa-miR-424     | 0,34 | 0,011   |
| hsa-miR-720    | 4,56  | 0,004   | hsa-miR-103     | 2,12 | 0,070   | hsa-miR-660     | 1,32 | 0,366   | hsa-miR-193a-3p | 0,34 | 0,010   |
| hsa-miR-18a    | 4,52  | 0,016   | hsa-miR-137     | 2,12 | 0,030   | hsa-miR-148b    | 1,31 | 0,192   | hsa-miR-542-5p  | 0,25 | 0,006   |
| hsa-miR-361-5p | 4,35  | 0,023   | hsa-miR-425     | 2,10 | 0,052   | hsa-miR-615-3p  | 1,30 | 0,633   | hsa-miR-503     | 0,17 | 0,089   |
| hsa-miR-381    | 4,29  | 0,174   | hsa-miR-130b    | 2,10 | 0,173   | hsa-miR-505     | 1,28 | 0,197   | hsa-miR-205     | 0,15 | 0,037   |
| hsa-miR-223    | 4,22  | 0,027   | hsa-miR-369-5p  | 2,09 | 0,171   | hsa-miR-132     | 1,27 | 0,595   | hsa-miR-146a    | 0,13 | 0,005   |
| hsa-miR-29b    | 4,13  | 0,000   | hsa-let-7g      | 2,08 | 0,105   | hsa-miR-22*     | 1,27 | 0,540   |                 |      |         |
| hsa-let-7f     | 4,13  | 0,029   | hsa-miR-24      | 2,07 | 0,040   | hsa-miR-92a     | 1,26 | 0,109   |                 |      |         |
| hsa-miR-142-3p | 3,94  | 0,038   | hsa-miR-365     | 2,04 | 0,039   | hsa-miR-181b    | 1,26 | 0,305   |                 |      |         |
| hsa-let-7d     | 3,92  | 0,028   | hsa-miR-377     | 1,99 | 0,096   | hsa-miR-483-3p  | 1,25 | 0,747   |                 |      |         |
| hsa-miR-376a   | 3,80  | 0,026   | hsa-miR-23b     | 1,97 | 0,057   | hsa-miR-101     | 1,23 | 0,429   |                 |      |         |
| hsa-miR-598    | 3,69  | 0,079   | hsa-miR-30b     | 1,96 | 0,065   | hsa-miR-326     | 1,21 | 0,191   |                 |      |         |
| hsa-miR-142-5p | 3,68  | 0,009   | hsa-miR-126     | 1,94 | 0,060   | hsa-miR-497     | 1,20 | 0,434   |                 |      |         |
| hsa-miR-410    | 3,65  | 0,147   | hsa-miR-221     | 1,93 | 0,011   | hsa-miR-574-3p  | 1,16 | 0,486   |                 |      |         |
| hsa-miR-301a   | 3,41  | 0,036   | hsa-miR-652     | 1,91 | 0,025   | hsa-miR-345     | 1,14 | 0,565   |                 |      |         |
| hsa-miR-155    | 3,36  | 0,048   | hsa-let-7c      | 1,90 | 0,002   | hsa-miR-455-5p  | 1,12 | 0,672   |                 |      |         |
| hsa-miR-18b    | 3,35  | 0,011   | hsa-miR-134     | 1,90 | 0,003   | hsa-miR-484     | 1,11 | 0,432   |                 |      |         |
| hsa-miR-376b   | 3,33  | 0,012   | hsa-miR-27a     | 1,87 | 0,033   | hsa-miR-185     | 1,10 | 0,287   |                 |      |         |
| hsa-miR-15b    | 3,20  | 0,042   | hsa-miR-622     | 1,86 | 0,030   | hsa-miR-590-5p  | 1,09 | 0,803   |                 |      |         |
| hsa-miR-106a   | 3,14  | 0,036   | hsa-miR-20b*    | 1,84 | 0,312   | hsa-miR-154     | 1,09 | 0,821   |                 |      |         |
| hsa-miR-100    | 3,12  | 0,002   | hsa-miR-29a     | 1,80 | 0,064   | hsa-miR-217     | 1,07 | 0,833   |                 |      |         |
| hsa-miR-766    | 3,10  | 0,090   | hsa-miR-582-5p  | 1,77 | 0,292   | hsa-miR-671-5p  | 1,06 | 0,621   |                 |      |         |
| hsa-miR-329    | 3,02  | 0,027   | hsa-miR-181a    | 1,77 | 0,019   | hsa-miR-877     | 1,04 | 0,957   |                 |      |         |
| hsa-miR-33b    | 3,01  | 0,109   | hsa-miR-30d     | 1,76 | 0,150   | hsa-miR-486-5p  | 1,01 | 0,904   |                 |      |         |
| hsa-miR-299-5p | 2,95  | 0,165   | hsa-miR-16      | 1,76 | 0,165   | hsa-miR-324-5p  | 1,01 | 0,904   |                 |      |         |
| hsa-miR-33a    | 2,94  | 0,006   | hsa-miR-374b    | 1,73 | 0,140   | hsa-miR-224     | 1,00 | 0,986   |                 |      |         |
| hsa-miR-17     | 2,93  | 0,106   | hsa-miR-409-3p  | 1,71 | 0,161   | hsa-miR-25      | 0,98 | 0,843   |                 |      |         |
| hsa-let-7a     | 2,92  | 0,016   | hsa-miR-99b     | 1,71 | 0,032   | hsa-miR-30c-2*  | 0,95 | 0,942   |                 |      |         |
| hsa-miR-30e*   | 2,82  | 0,078   | hsa-miR-323-3p  | 1,71 | 0,092   | hsa-miR-22      | 0,94 | 0,708   |                 |      |         |
| hsa-miR-98     | 2,80  | 0,002   | hsa-miR-214     | 1,68 | 0,055   | hsa-miR-188-5p  | 0,93 | 0,475   |                 |      |         |
| hsa-miR-30c    | 2,76  | 0,031   | hsa-miR-125a-5p | 1,67 | 0,096   | hsa-miR-490-3p  | 0,92 | 0,867   |                 |      |         |
| hsa-miR-423-3p | 2,75  | 0,068   | hsa-miR-151-3p  | 1,67 | 0,011   | hsa-miR-324-3p  | 0,92 | 0,791   |                 |      |         |
| hsa-miR-411    | 2,68  | 0,048   | hsa-miR-19b     | 1,63 | 0,051   | hsa-miR-378     | 0,91 | 0,634   |                 |      |         |
| hsa-miR-150    | 2,64  | 0,263   | hsa-miR-15a     | 1,61 | 0,117   | hsa-miR-452     | 0,90 | 0,888   |                 |      |         |
| hsa-miR-21*    | 2,60  | 0,036   | hsa-let-7e      | 1,61 | 0,030   | hsa-miR-532-5p  | 0,89 | 0,791   |                 |      |         |
| hsa-miR-370    | 2,60  | 0,032   | hsa-miR-186     | 1,57 | 0,055   | hsa-miR-663     | 0,84 | 0,414   |                 |      |         |
| hsa-miR-30a    | 2,59  | 0,052   | hsa-miR-204     | 1,57 | 0,563   | hsa-miR-337-5p  | 0,84 | 0,687   |                 |      |         |
| hsa-miR-151-5p | 2,58  | 0,022   | hsa-miR-26a     | 1,57 | 0,162   | hsa-miR-10b     | 0,83 | 0,287   |                 |      |         |
| hsa-miR-20a    | 2,55  | 0,033   | hsa-miR-136     | 1,54 | 0,003   | hsa-miR-361-3p  | 0,78 | 0,580   |                 |      |         |
| hsa-miR-106b   | 2,54  | 0,061   | hsa-miR-602     | 1,54 | 0,051   | hsa-miR-199a-5p | 0,76 | 0,729   |                 |      |         |
| hsa-miR-331-3p | 2,50  | 0,032   | hsa-miR-887     | 1,54 | 0,284   | hsa-miR-99a     | 0,76 | 0,103   |                 |      |         |
| hsa-miR-29c    | 2,50  | 0,073   | hsa-miR-299-3p  | 1,53 | 0,469   | hsa-miR-215     | 0,76 | 0,560   |                 |      |         |
| hsa-miR-107    | 2,48  | 0,004   | hsa-miR-125b    | 1,53 | 0,244   | hsa-miR-144     | 0,75 | 0,308   |                 |      |         |
| hsa-miR-127-5p | 2,43  | 0,137   | hsa-miR-509-3p  | 1,51 | 0,576   | hsa-miR-346     | 0,74 | 0,473   |                 |      |         |
| hsa-miR-194    | 2,42  | 0,291   | hsa-miR-193a-5p | 1,51 | 0,267   | hsa-miR-192     | 0,72 | 0,363   |                 |      |         |
| hsa-miR-28-5p  | 2,41  | 0,023   | hsa-miR-342-3p  | 1,50 | 0,165   | hsa-miR-320a    | 0,71 | 0,075   |                 |      |         |

**Figure S2**

(A) Table of miRNA common between HUVECs and exosomes or only detected in exosomes or in producing HUVECs. (B) Table of the 204 miRNAs detected in exosomes from HUVECs cultured in basal or tumoral displaying a variation lower than 2 between replicates and an individual Ct value lower than 40.

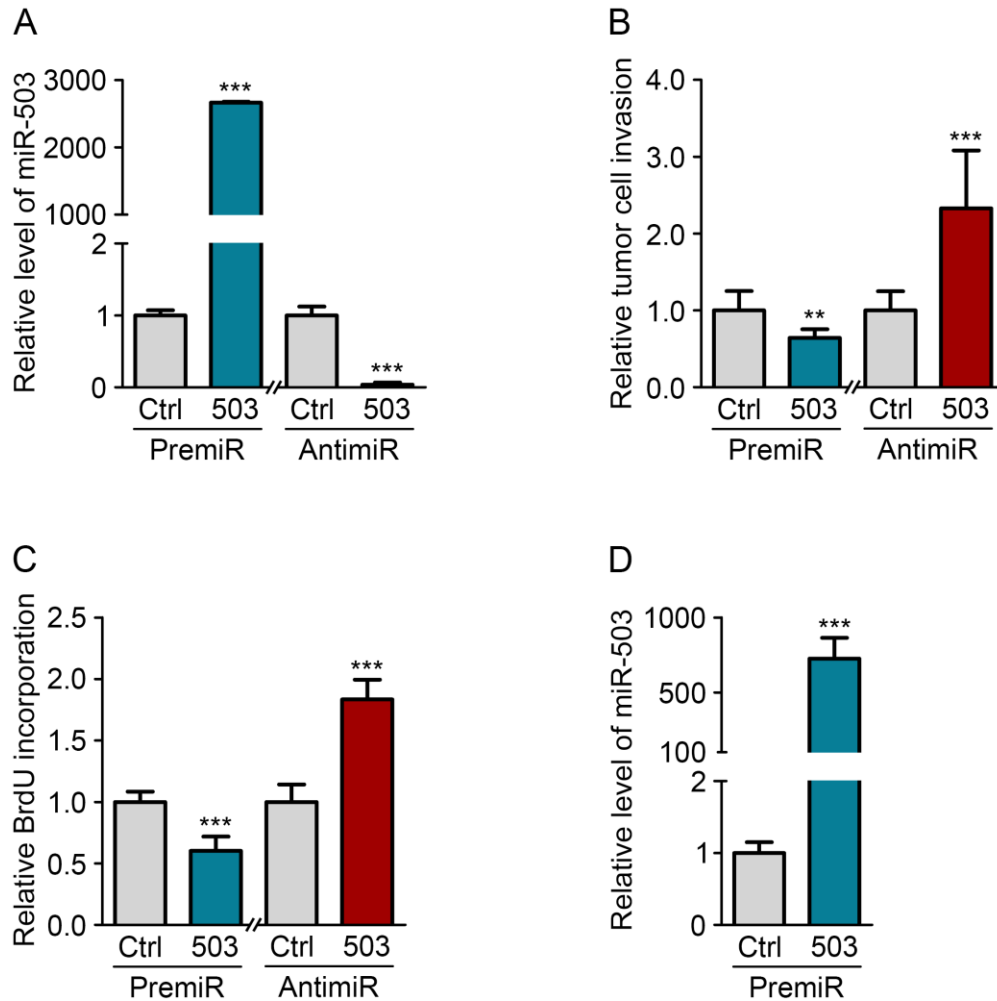

**Figure S3**

(A) MiR-503 levels, evaluated by qRT-PCR, in MDA-MB-231 cells transfected with pre-miR-control or pre-miR-503 and with anti-miR-control or anti-miR-503. (B) Boyden invasion assay of MDA-MB-231 cells transfected with pre-miR-control or pre-miR-503 and with anti-miR-control or anti-miR-503. (C) BrdU incorporation in MDA-MB-231 cells transfected with pre-miR-control or pre-miR-503 and with anti-miR-control or anti-miR-503. (D) MiR-503 levels, evaluated by qRT-PCR, in HUVECs transfected with pre-miR-control or pre-miR-503.

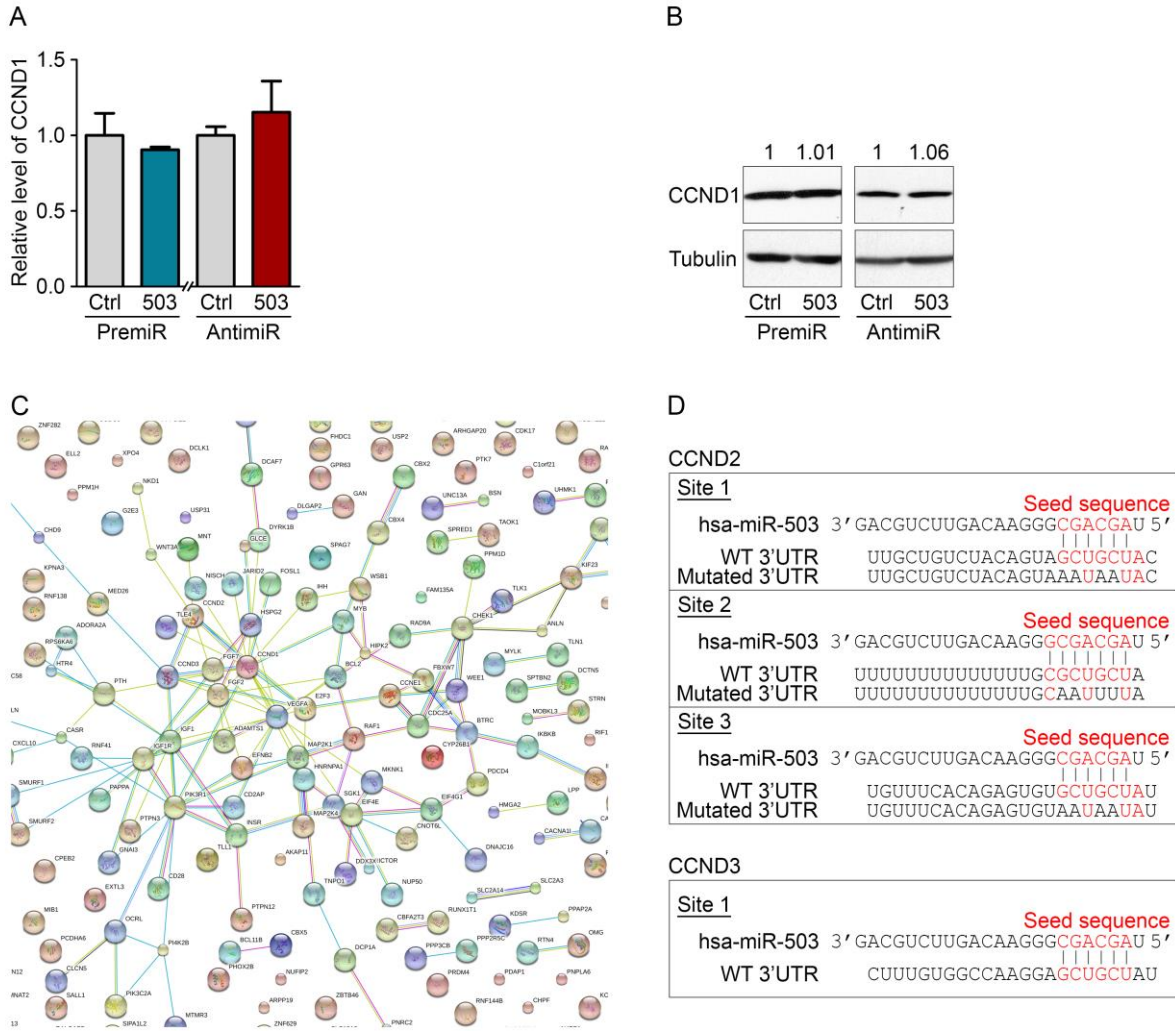

**Figure S4**

(A) mRNA levels, quantified by qRT-PCR, of CCND1 in MDA-MB-231 cells transfected with pre-miR-503 or pre-miR-control and with anti-miR-control or anti-miR-503 and starved for 36 h. (B) Western blotting of CCND1 in MDA-MB-231 cells transfected with pre-miR-503 or pre-miR-control and with anti-miR-control or anti-miR-503 and starved for 36 h. (C) Bioinformatics analysis of miR-503 target genes predicted by Targetscan using String 9.1 software. (D) Predicted miR-503 binding sites within the 3'-UTRs of CCND2 and CCND3.
